# Supplementary material for: Experiences of Family Caregivers of Patients with Traumatic Brain Injury: A Study in the Tamale Metropolis
Source: Research Square preprint supplement (doi:10.21203/rs.3.rs-6411629/v1), 2025-06-01
Supplement: Supplementary file 1 [file a0a8bc926813044906f1823d.docx]

**APPENDIX A: INTERVIEW GUIDE**

**SECTION A: DEMOGRAPHIC INFORMATION OF**

**PARTICIPANTS (FAMILY CAREGIVERS)**

Please can you tell me about yourself?

1. Gender ………………………….
2. Age …………………………………….
3. Marital Status ………………………………………………………………..
4. Religion ……………………………………………………………………..
5. Occupation ………………………………………………………………….
6. Level of Education …………………………………………………………
7. Ethnicity
8. Relationship

**CARE RECIPIENT INFORMATION**

1. Age
2. Time since injury
3. TBI etiology
4. Reported severity
5. Do you still receive treatment? If yes, what type of treatment
6. Please can you tell me what you know about TBI, the condition your relative has

**SECTION B**

1. **PSYCHOSOCIAL EXPERIENCES**

**Please tell me how caregiving has affected you psychologically**

1. How have you being feeling after taking up the care of your TBI survivor?

Probes

- Negative
- Positive

**Please tell me how caregiving has affected you socially**?

1. How has your caring role affected your relationship with

Probes

- Friends
- Relatives

1. How has the caring role affected your relationship with the patient?

Probes

1. Sexual relationships (if spouse)
2. How has caring affected your other roles and responsibilities?

Probes

- Primary role as a wife or husband.
- Taking care of other family members

1. **COPING STRATEGIES**
2. How have you been coping with the caregiving role, can you please share with me?

Probes

- Psychological
- Social

1. Is there anything else you would like to tell me?

Thank you.
